# Supplementary material for: Prognostic implication of residual inflammatory trajectories in acute type I aortic dissection: dual-center prospective cohort study
Source: PubMed Central journal article supplement — Int J Surg. 2024 Mar 4;110(6):3346–56. doi: 10.1097/JS9.0000000000001245 (PMC11177605; doi:10.1097/js9.0000000000001245), 2024-03-04
Supplement: js9-110-3346-s002.pdf [file js9-110-3346-s002.pdf]

**Supplemental table I Compare Models with Latent Class Trajectory =1, 2, 3, 4, 5**

| Trajectory | BIC  | Cluster 1   | Cluster 2   | Cluster 3   | Cluster 4  | Cluster 5 |
|------------|------|-------------|-------------|-------------|------------|-----------|
| 1          | 9756 | 100 (%)     |             |             |            |           |
| 2          | 9666 | 228 (92.7%) | 18 (7.3%)   |             |            |           |
| 3          | 9683 | 45 (18.3%)  | 105 (42.7%) | 96 (39.0%)  |            |           |
| 4          | 9679 | 35 (14.2%)  | 86 (35.0%)  | 34 (13.8%)  | 91 (37.0%) |           |
| 5          | 9703 | 48 (19.5%)  | 59 (24.0%)  | 102 (41.5%) | 19 (7.7%)  | 18 (7.3%) |

**Supplemental table 2 Latent Class Linear Mixed Model with Three-Group**

**Trajectory Posterior Class Probability**

|                  | N (%)       | Mean probability | Min probability | 25% probability | Median probability | 75% probability | Max probability |
|------------------|-------------|------------------|-----------------|-----------------|--------------------|-----------------|-----------------|
| Cluster $\alpha$ | 45 (18.3%)  | 0.85             | 0.44            | 0.80            | 0.91               | 0.96            | 0.99            |
| Cluster $\beta$  | 105 (42.7%) | 0.75             | 0.57            | 0.66            | 0.79               | 0.87            | 0.94            |
| Cluster $\gamma$ | 96 (39.0%)  | 0.89             | 0.46            | 0.77            | 0.98               | 0.99            | 1.0             |

**Supplemental Table 3 Results of Cox Proportional Hazard Model Assessing the Effect of Platelet-Leukocyte Ratio Trajectory Group on Mortality at 30 Days**

|                                                                                | <b>Hazard ratio (95%CI)</b> | <b>P value</b> |
|--------------------------------------------------------------------------------|-----------------------------|----------------|
| <b>Mortality at 30 days</b>                                                    |                             |                |
| <b>Unadjusted</b>                                                              |                             |                |
| $\alpha$ (N <sub>1</sub> =45)                                                  | 1.0 (ref.)                  |                |
| $\beta$ (N <sub>2</sub> =105)                                                  | 1.712 (0.364, 8.063)        | 0.496          |
| $\gamma$ (N <sub>3</sub> =96)                                                  | 3.505 (0.797, 15.425)       | 0.097          |
| <b>Adjusted for baseline and clinical factors</b>                              |                             |                |
| $\alpha$ (N <sub>1</sub> =45)                                                  | 1.0 (ref.)                  |                |
| $\beta$ (N <sub>2</sub> =105)                                                  | 1.645 (0.345, 7.838)        | 0.532          |
| $\gamma$ (N <sub>3</sub> =96)                                                  | 3.392 (0.760, 15.127)       | 0.109          |
| <b>Adjusted for baseline, clinical, and procedural factors</b>                 |                             |                |
| $\alpha$ (N <sub>1</sub> =45)                                                  | 1.0 (ref.)                  |                |
| $\beta$ (N <sub>2</sub> =105)                                                  | 1.615 (0.335, 7.777)        | 0.550          |
| $\gamma$ (N <sub>3</sub> =96)                                                  | 3.575 (0.792, 16.133)       | 0.098          |
| <b>Mortality at 30 days</b>                                                    |                             |                |
| <b>Unadjusted</b>                                                              |                             |                |
| <b>Pooled <math>\alpha</math> and <math>\beta</math> (N<sub>1+2</sub>=150)</b> | 1.0 (ref.)                  |                |
| $\gamma$ (N <sub>3</sub> =96)                                                  | 2.339 (1.039, 5.266)        | 0.040          |
| <b>Adjusted for baseline and clinical factors</b>                              |                             |                |
| <b>Pooled <math>\alpha</math> and <math>\beta</math> (N<sub>1+2</sub>=150)</b> | 1.0 (ref.)                  |                |
| $\gamma$ (N <sub>3</sub> =96)                                                  | 2.323 (1.029, 5.246)        | 0.042          |
| <b>Adjusted for baseline, clinical, and procedural factors</b>                 |                             |                |
| <b>Pooled <math>\alpha</math> and <math>\beta</math> (N<sub>1+2</sub>=150)</b> | 1.0 (ref.)                  |                |
| $\gamma$ (N <sub>3</sub> =96)                                                  | 2.485 (1.080, 5.720)        | 0.032          |

**Supplemental Table 4 The Effect of Ulinastatin on Mortality at Last Follow-up by Platelet-Leukocyte Ratio Trajectory Group**

|                                                                | <b>Hazard ratio (95%CI)<br/>(no use vs use of ulinastatin)</b> | <b>P value</b> |
|----------------------------------------------------------------|----------------------------------------------------------------|----------------|
| <b>Crude</b>                                                   |                                                                |                |
| Overall                                                        | 0.539 (0.224, 1.297)                                           | 0.167          |
| Three-trajectory group                                         |                                                                |                |
| α (N <sub>1</sub> =45)                                         | 1.071 (0.097, 11.813)                                          | 0.955          |
| β (N <sub>2</sub> =105)                                        | 0.251 (0.032, 1.979)                                           | 0.189          |
| γ (N <sub>3</sub> =96)                                         | 0.768 (0.260, 2.270)                                           | 0.633          |
| Two-trajectory group                                           |                                                                |                |
| Pooled α and β (N <sub>1+2</sub> =150)                         | 0.403 (0.089, 1.820)                                           | 0.237          |
| γ (N <sub>3</sub> =96)                                         | 0.768 (0.260, 2.270)                                           | 0.633          |
| <b>Adjusted for baseline and clinical factors</b>              |                                                                |                |
| Overall                                                        | 0.591 (0.238, 1.468)                                           | 0.257          |
| Three-trajectory group                                         |                                                                |                |
| α (N <sub>1</sub> =45)                                         | 0.775 (0.069, 8.652)                                           | 0.835          |
| β (N <sub>2</sub> =105)                                        | 0.174 (0.021, 1.435)                                           | 0.104          |
| γ (N <sub>3</sub> =96)                                         | 0.985 (0.305, 3.189)                                           | 0.980          |
| Two-trajectory group                                           |                                                                |                |
| Pooled α and β (N <sub>1+2</sub> =150)                         | 0.294 (0.063, 1.360)                                           | 0.117          |
| γ (N <sub>3</sub> =96)                                         | 0.985 (0.305, 3.189)                                           | 0.980          |
| <b>Adjusted for baseline, clinical, and procedural factors</b> |                                                                |                |
| Overall                                                        | 0.580 (0.233, 1.442)                                           | 0.241          |
| Three-trajectory group                                         |                                                                |                |
| α (N <sub>1</sub> =45)                                         | 0.749 (0.067, 8.339)                                           | 0.813          |
| β (N <sub>2</sub> =105)                                        | 0.176 (0.021, 1.455)                                           | 0.107          |
| γ (N <sub>3</sub> =96)                                         | 0.979 (0.301, 3.186)                                           | 0.972          |
| Two-trajectory group                                           |                                                                |                |
| Pooled α and β (N <sub>1+2</sub> =150)                         | 0.294 (0.063, 1.362)                                           | 0.117          |
| γ (N <sub>3</sub> =96)                                         | 0.979 (0.301, 3.186)                                           | 0.972          |

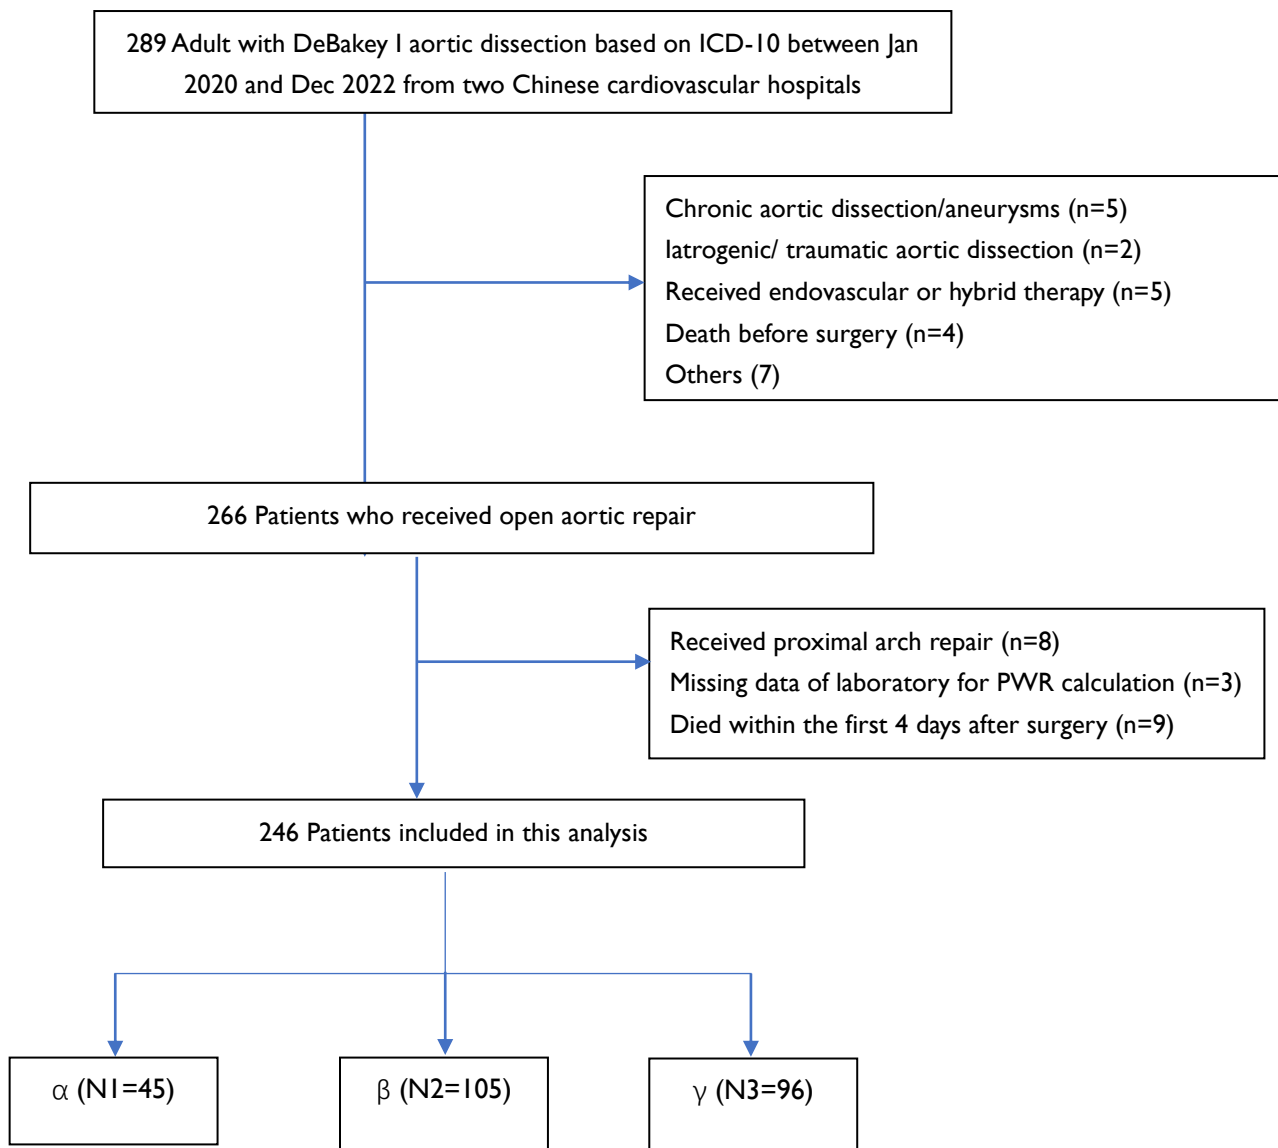

**Supplemental Figure I Patient selection flow chart**

PWR: platelet-white blood cell ratio

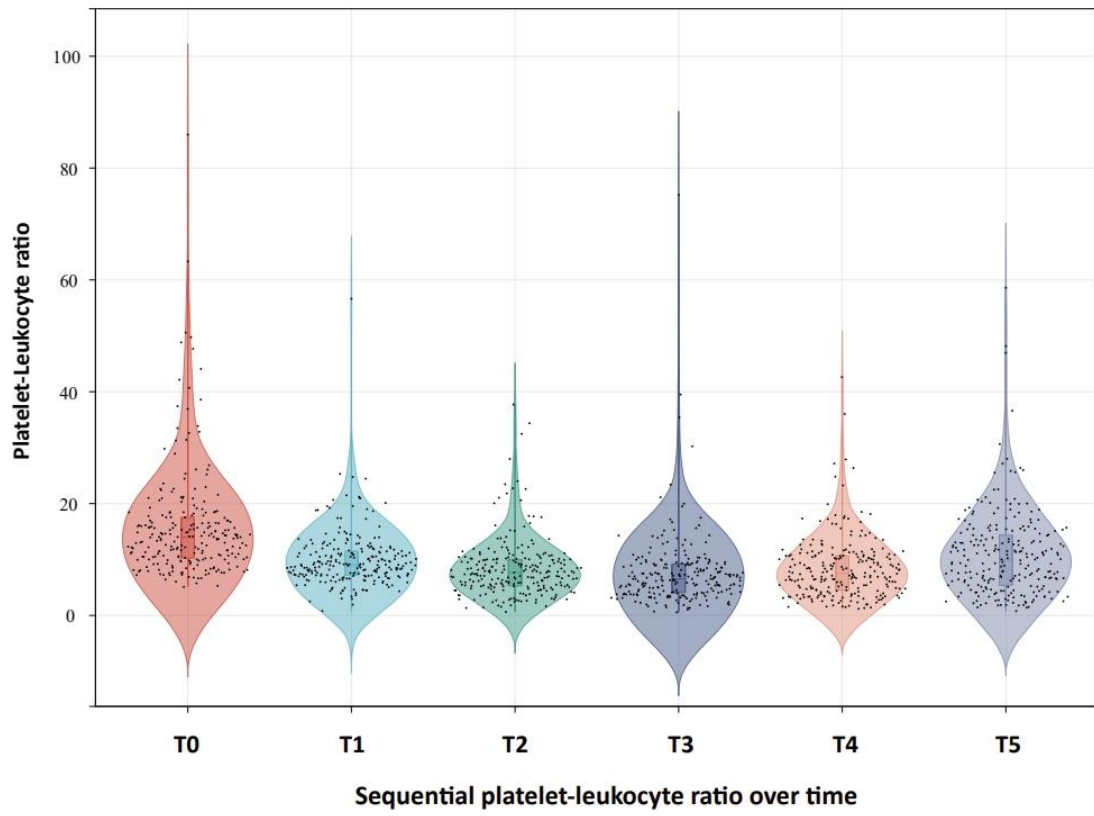

**Supplemental Figure 2 Sequential platelet-leukocyte ratio over time of entire cohort**

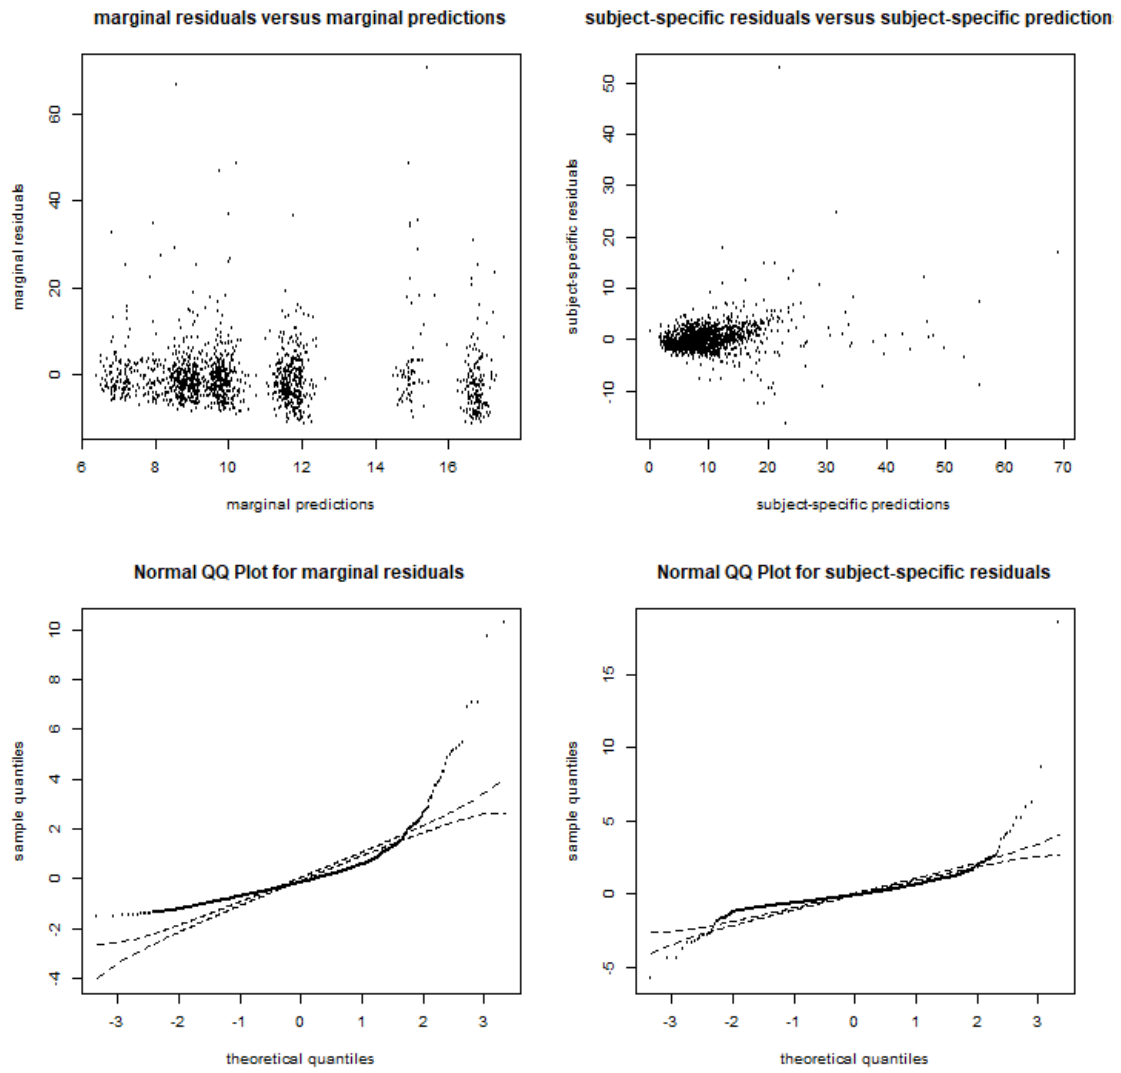

**Supplemental Figure 3** Statistics performances of latent class extend mixed model

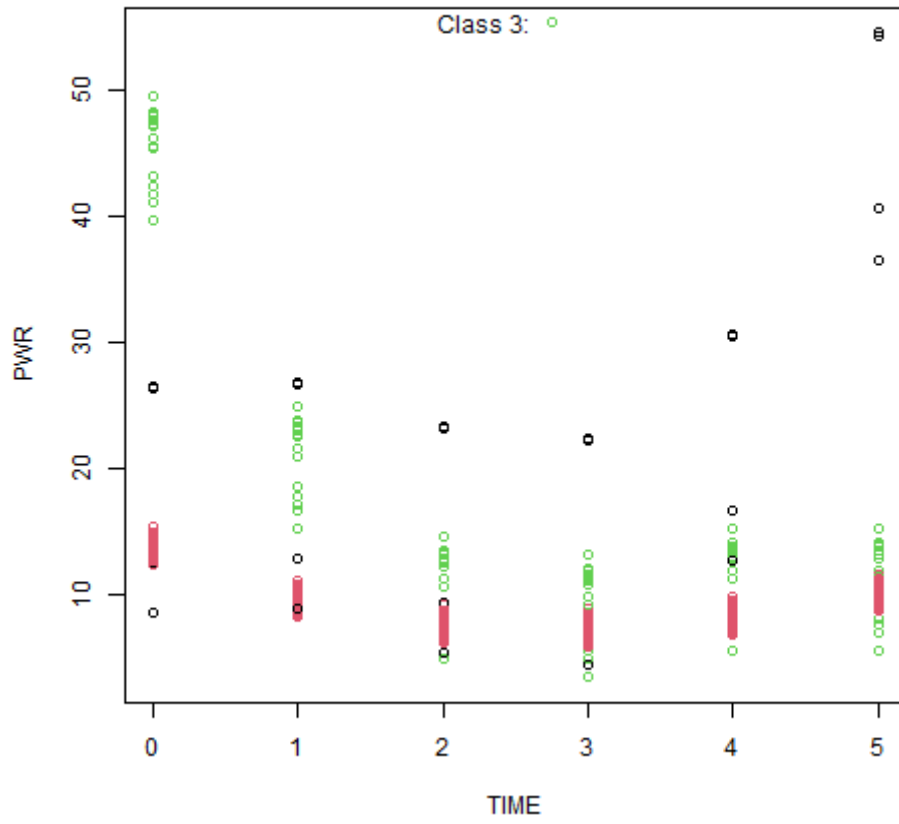

**Supplemental Figure 4** Predicted leukocyte count trajectory over time



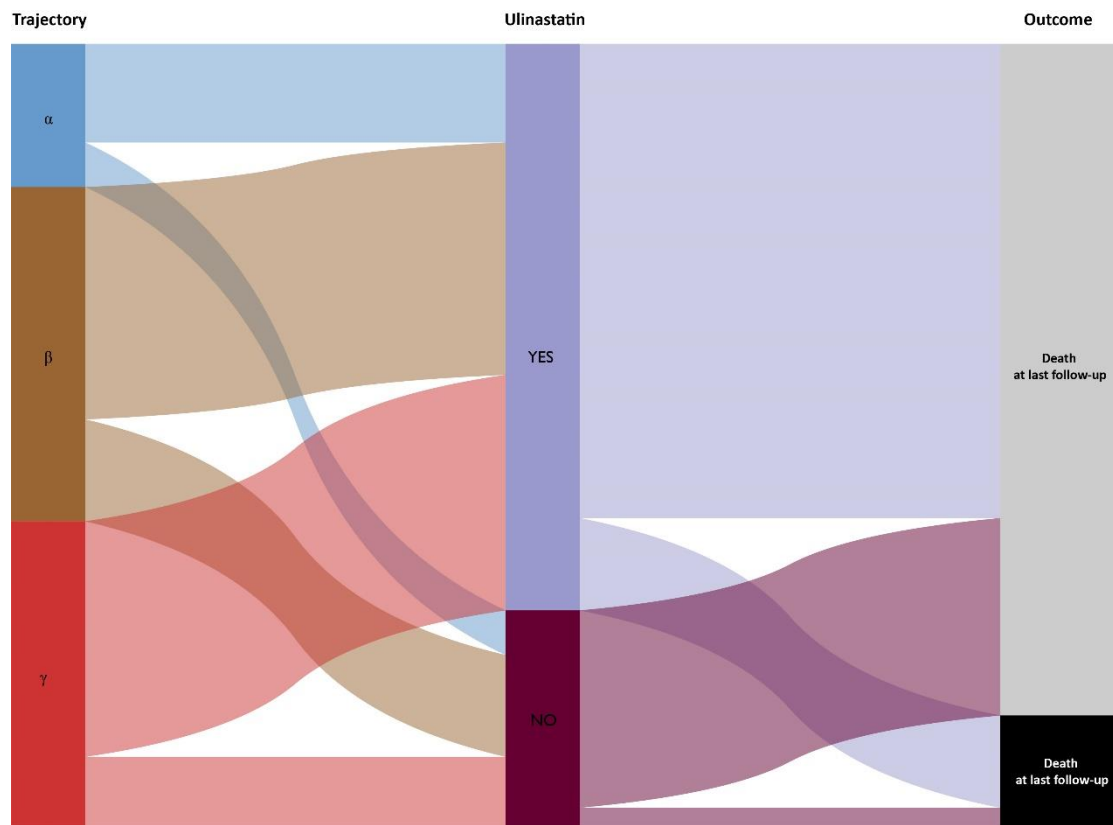

**Supplemental Figure 5 Alluvial plot of leukocyte trajectory across ulinastatin use and mortality**

## **China Additive Anti-inflammatory Action for Aortopathy & Arteriopathy (5A)**

### **Investigators**

Hong Liu MD, PhD, Department of Cardiovascular Surgery, the First Affiliated Hospital of Nanjing Medical University, Nanjing 210029, P.R China;

Sheng Zhao MD, PhD, Department of Cardiovascular Surgery, the First Affiliated Hospital of Nanjing Medical University, Nanjing 210029, P.R China;

Yong-feng Shao, MD, PhD, Department of Cardiovascular Surgery, the First Affiliated Hospital of Nanjing Medical University, Nanjing 210029, P.R China;

Zhi-wei Tang, MD, Department of Cardiovascular Surgery, the First Affiliated Hospital of Nanjing Medical University, Nanjing 210029, P.R China;

Si-chong Qian MD, PhD, Department of Cardiovascular Surgery, Beijing Anzhen Hospital, Capital Medical University, Beijing 100029, P.R China;

Hai-yang Li, MD, PhD, Department of Cardiovascular Surgery, Beijing Anzhen Hospital, Capital Medical University, Beijing 100029, P.R China;

Hong-jia Zhang, MD, PhD, Department of Cardiovascular Surgery, Beijing Anzhen Hospital, Capital Medical University, Beijing 100029, P.R China;

Ying-yuan Zhang, MD, Department of Cardiovascular Surgery, the First Affiliated Hospital of Guangzhou Medical University, Guangzhou 510120, P.R China;

Ying Wu MD, Department of Laboratory, the First Affiliated Hospital of Shantou University Medical College, Shantou 515041, P.R China;

Liang Hong MD; Department of Cardiovascular Surgery, Nanjing First Hospital, Nanjing Medical University, Nanjing 210012, P.R China;

Ji-nong Yang MD; Department of Cardiovascular Surgery, the Affiliated Hospital of Qingdao University, Qingdao 266003, P.R China;

Ji-sheng Zhong MD; Department of Cardiovascular Surgery, Xiamen Cardiovascular Hospital, Xiamen University, Xiamen 361004, P.R China;

Tian Niu, MD, Department of Cardiovascular Surgery, Xiamen Cardiovascular Hospital, Xiamen University, Xiamen 361004, P.R China;

Yu-qi Wang MD; Department of Cardiovascular Surgery, Teda International Cardiovascular Hospital, Chinese Academy of Medical Sciences, Tianjin 300457, P.R China;

Bing-qi Sun MD; Department of Cardiovascular Surgery, Teda International Cardiovascular Hospital, Chinese Academy of Medical Sciences, Tianjin 300457, P.R China;

Dong Kai Wu MD, PhD, Department of Cardiovascular Surgery, Xiangya Hospital, Central South University, Changsha 410008, P.R China;

Guo-liang Fan MD, Department of Cardiovascular Surgery, Shanghai East Hospital, Tongji University, Shanghai 200120, P.R China.

Jun-quan Chen, MD, PhD, Department of Cardiovascular Surgery, Tianjin Chest Hospital, Tianjin Medical University, Tianjin 300222, P.R China;

Dong-dong Wu MD, PhD, Department of Cardiovascular Surgery, Beijing Fuwai Hospital, Peking Union Medical College & Chinese Academy of Medical Sciences, Beijing 100037, P.R China;

Yi-yao Jiang, MD, PhD, Department of Cardiovascular Surgery, the First Affiliated Hospital of Bengbu Medical College, Bengbu 233099, P.R China;

Sheng-qiang Zhang, MD, Department of Cardiovascular Surgery, the First Affiliated Hospital of Bengbu Medical College, Bengbu 233099, P.R China;

Si-qiang Zheng, MD, PhD, Department of Thoracic Surgery, Shanghai Lung Hospital, Tongji University, Shanghai 200433, P.R China;

Xin-ya Li, MD, PhD, Department of Cardiovascular Surgery, the First Hospital of University of Science and Technology of China, Hefei 230002, China;

Hong-hua Yue, MD, PhD, Department of Cardiovascular Surgery, West China School of Medicine and West China Hospital, Sichuan University, Chengdu 610041, China;

Zhi-hua Zeng, MD, Department of Cardiovascular Surgery, the Second Affiliated Hospital of Nanchang University, Nanchang 330008, P.R China;

Lu Han, MD, Department of Cardiovascular Surgery, Beijing Chaoyang Hospital, Capital Medical University, Beijing 100043, P.R China;
